# Supplementary material for: Structural tuning of Zn(ii)-MOFs based on pyrazole functionalized carboxylic acid ligands for organic dye adsorption
Source: Royal Society of Chemistry journal article supplement (doi:10.1039/d0ce00798f), 2020-01-01
Supplement: d0ce00798f1.pdf [file d0ce00798f1.pdf]

*Electronic Supplementary Information (ESI):*

**Structural tuning of Zn(II)-MOFs based on pyrazole functionalized carboxylic acid ligands for organic dye adsorption**

**Xiao-Ting Liu,<sup>†a,b</sup> Si-Si Chen,<sup>†a</sup> Si-Miao Li,<sup>a</sup> Hong-Xiang Nie,<sup>a,b</sup> Yao-Qing Feng,<sup>a</sup>**

**Yi-Ning Fan,<sup>a</sup> Mei-Hui Yu,<sup>\*a,b</sup> Ze Chang<sup>\*a,b,c</sup> and Xian-He Bu<sup>a,b,d</sup>**

*<sup>a</sup> School of Materials Science and Engineering, National Institute for Advanced Materials, Tianjin Key Laboratory of Metal and Molecule-Based Material Chemistry, Nankai University, Tianjin 300350, China.*

*<sup>b</sup> Collaborative Innovation Center of Chemical Science and Engineering (Tianjin), Tianjin 300072, China.*

*<sup>c</sup> State Key Laboratory of Structural Chemistry, Fujian Institute of Research on the Structure of Matter, Chinese Academy of Sciences, Fuzhou, Fujian 350002, China.*

*<sup>d</sup> State Key Laboratory of Elemento-Organic Chemistry, College of Chemistry, Nankai University, Tianjin 300071, China.*

*<sup>†</sup> These authors contribute equally to this work.*

Corresponding Author

E-mail: [changze@nankai.edu.cn](mailto:changze@nankai.edu.cn); [mh@nankai.edu.cn](mailto:mh@nankai.edu.cn)

## Experimental Section

### Chemicals and Materials

All the reagents and solvents were purchased commercially and were not further purified when used. 4-(1H-pyrazol-4-yl)benzoic acid (H<sub>2</sub>PBA) was purchased from Shanghai Boyners Pharmaceutical. Zn(NO<sub>3</sub>)<sub>2</sub>·6H<sub>2</sub>O and DMF solvent were purchased from Concord Technology (Tianjin). 5-(1H-pyrazole-4-carboxamido)isophthalic acid (H<sub>3</sub>Pycia) was synthesized according to the reference<sup>[S1]</sup>. The structures of H<sub>3</sub>Pycia H<sub>2</sub>PBA ligands were shown in Fig. S1.

### Materials and Instrumentation

Thermogravimetric analysis (TGA) was performed on a Rigaku Thermo Plus EVO2 8121 analyzer in N<sub>2</sub> environment with a heating rate of 10°C min<sup>-1</sup> from 20°C to 800°C, using an empty Al<sub>2</sub>O<sub>3</sub> crucible as reference. Powder X-ray diffraction (PXRD) data analysis were collected on a Rigaku Mini Flex600 diffractometer using Cu K $\alpha$  radiation ( $\lambda$  = 1.54184 Å) in the 2 $\theta$  range of 3–50° with a scanning rate of 3° min<sup>-1</sup>. Simulation of the PXRD patterns were carried out based on the single-crystal data by diffraction crystal module of the Mercury version 2.4 software. UV-Visible absorption spectral measurements were carried out on a Persee TU-1950 UV-Vis spectrophotometer.

### General Methods for X-ray Crystallography

The structure determination of MOF-1 was performed on a Rigaku 007 Saturn70 diffractometer at 113 K with Mo-K $\alpha$  radiation ( $\lambda$  = 0.71073 Å). The structure determination of MOF-2 was performed on a Rigaku XtalAB Pro MM007 DW diffractometer at 273 K with Cu-K $\alpha$  radiation ( $\lambda$  = 1.54178 Å). The structures were solved with direct methods using SHELXS package of the SHELXTL software and refined with SHELXL package. The disordered guest molecules in MOF-1 and MOF-2 are removed by SQUEEZE program as implemented in PLATON and the results were appended in the CIF files. Crystal data and selected bond lengths and angles were listed in Table S1-S3.

**Synthesis of MOF-1:**  $\text{Zn}(\text{NO}_3)_2 \cdot 6\text{H}_2\text{O}$  (0.15 mmol, 44.5 mg) and  $\text{H}_3\text{Pycia}$  (0.075 mmol, 20.6 mg) were dissolved in DMF/ $\text{H}_2\text{O}$ / $\text{HNO}_3$  (4.05 mL, 3:1:0.05, v/v/v). The mixture is transferred into an autoclave to react at 140 °C for 72 h and subsequently cooled to room temperature. Block-shaped colorless crystals were obtained with 80% yield (based on Zn). IR data: 3426s, 2792w, 1637s, 1535s, 1325m, 1245w, 1175w, 1112w, 1048m, 1004m, 863s, 769s, 720s, 663s, 443w (Fig. S2).

**Synthesis of MOF-2:**  $\text{Zn}(\text{NO}_3)_2 \cdot 6\text{H}_2\text{O}$  (0.20 mmol, 59.4 mg),  $\text{H}_3\text{Pycia}$  (0.05 mmol, 13.8 mg) and  $\text{H}_2\text{PBA}$  (0.05 mmol, 9.4 mg) were dissolved in DMF/ $\text{H}_2\text{O}$  (4 mL, 3:1, v/v). The mixture is transferred into a glass bottle to react at 92 °C for 72 h and subsequently cooled to room temperature. Bud-shaped colorless crystals were obtained with 80% yield (based on Zn). IR data: 3566s, 3114w, 2802w, 2360m, 1558s, 1387s, 1237m, 1181m, 1052m, 954w, 861m, 780s, 721s, 607w, 505w, 457w (Fig. S3).

### Dye adsorption

An exact amount of the adsorbents (10 mg) is added into the 20 mg/L DMF solution (4 mL) of  $\text{MB}^+$ ,  $\text{TO}^+$ ,  $\text{SD}^0$ ,  $\text{CM}^0$ ,  $\text{MO}^-$ ,  $\text{LB}^-$ ,  $\text{R6G}^+$ ,  $\text{VB}^+$ , and 20 mg/L DMF solution (4 mL, 1:1 by volume ratio ) of  $\text{MB}^+/\text{SD}^0$ ,  $\text{MB}^+/\text{CM}^0$ ,  $\text{MB}^+/\text{MO}^-$ ,  $\text{MB}^+/\text{LB}^-$  and  $\text{TO}^+/\text{SD}^0$ ,  $\text{TO}^+/\text{CM}^0$ ,  $\text{TO}^+/\text{MO}^-$ ,  $\text{TO}^+/\text{LB}^-$ , respectively. UV-vis absorption spectra are recorded simultaneously.

The adsorption capacity of MOF-1 and MOF-2 toward  $\text{MB}^+$  and  $\text{TO}^+$  can be deduced from the dependence of the saturated adsorption amount ( $q_e$ ) on the initial concentration of the adsorbent ( $c_0$ ) according to the eq:

$$q_e = (C_0 - C_t) \times V \div m$$

where V (l) is the volume of dye solution, m (g) is the mass of adsorbent,  $C_0$  and  $C_t$  (mg/l) are the initial and residual concentration of dye solutions, respectively.

In this experiment, 10 mg MOF adsorbent was added into 4 ml  $\text{MB}^+$  and 4 ml  $\text{TO}^+$  DMF solutions with a series of known initial concentrations, respectively. After 48 h,

the residues of MB<sup>+</sup> and TO<sup>+</sup> in solutions was determined UV-Vis spectrophotometer and the concentration was determined based on absorbance-concentration calibration curve (Fig. S17).

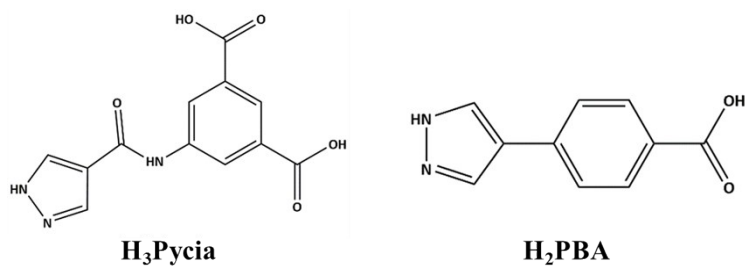

**Fig. S1.** The structures of H<sub>3</sub>Pycia and H<sub>2</sub>PBA ligands.

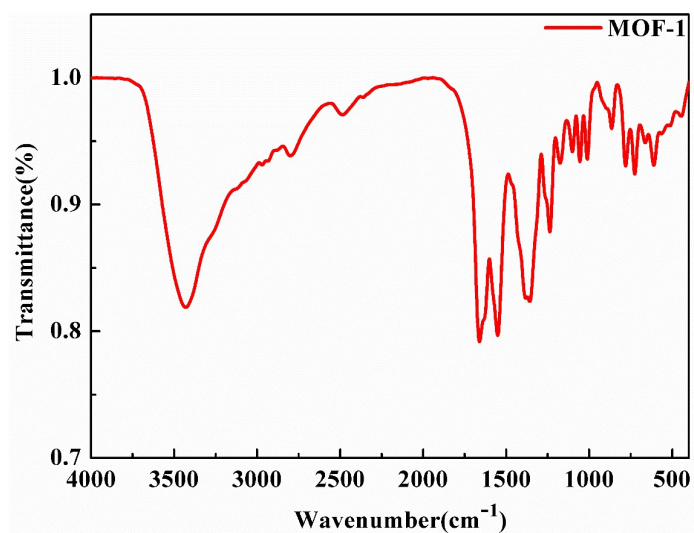

**Fig. S2.** The IR spectrum of MOF-1.

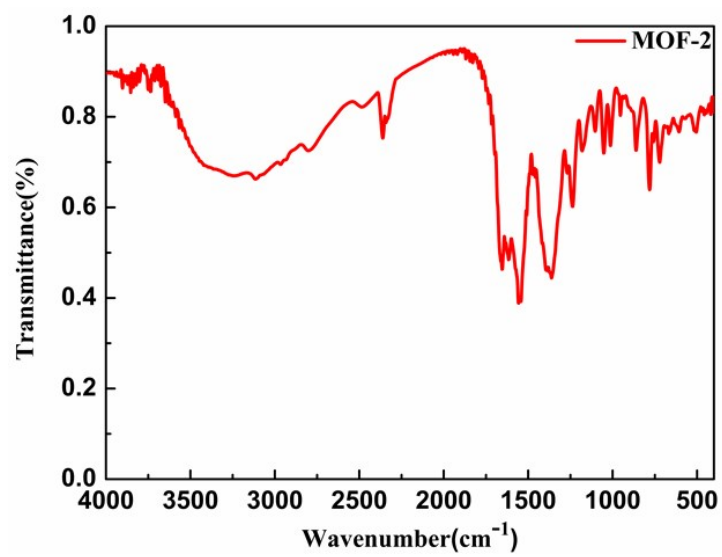

**Fig. S3.** The IR spectrum of MOF-2.

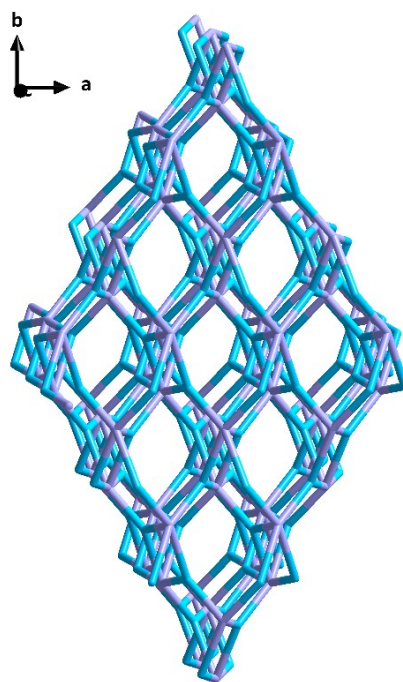

**Fig. S4.** Topology of MOF-1.

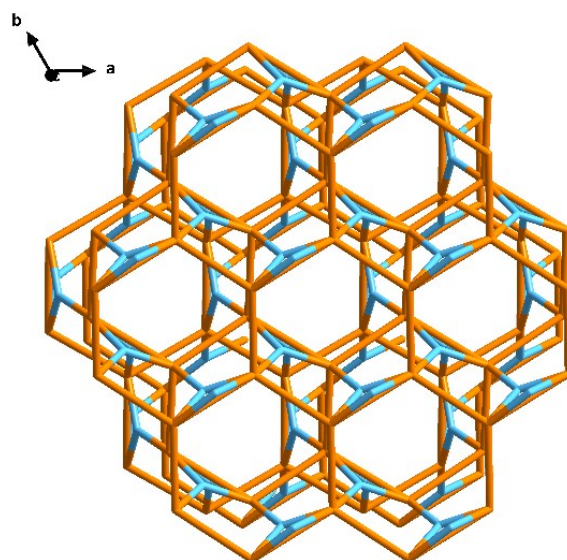

**Fig. S5.** Topology of MOF-2.

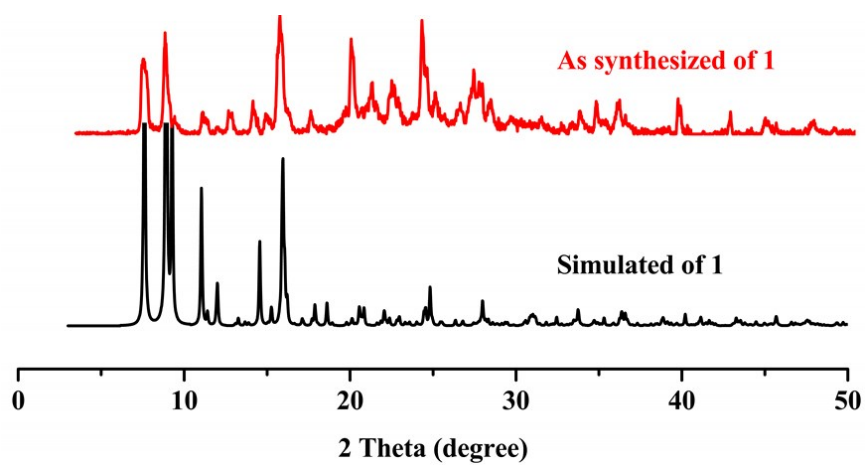

**Fig. S6.** Experimental and simulated powder X-Ray diffraction patterns for MOF-1.

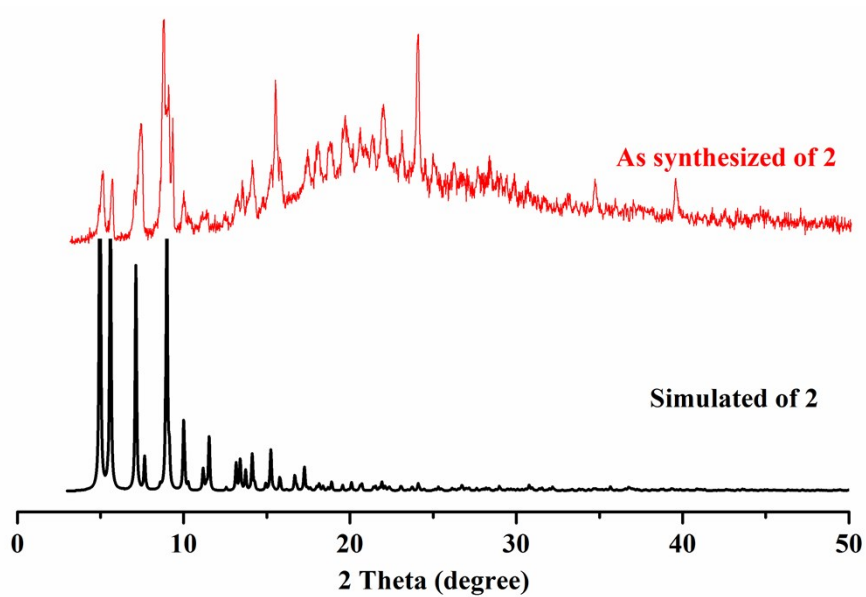

Fig. S7. Experimental and simulated powder X-Ray diffraction patterns for MOF-2.

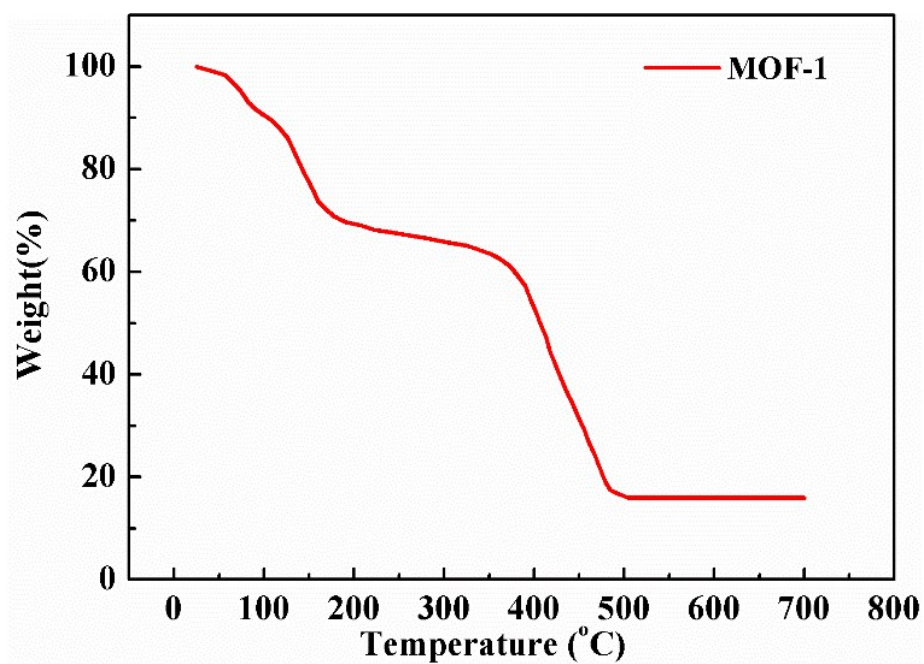

Fig. S8. The TGA curve of MOF-1.

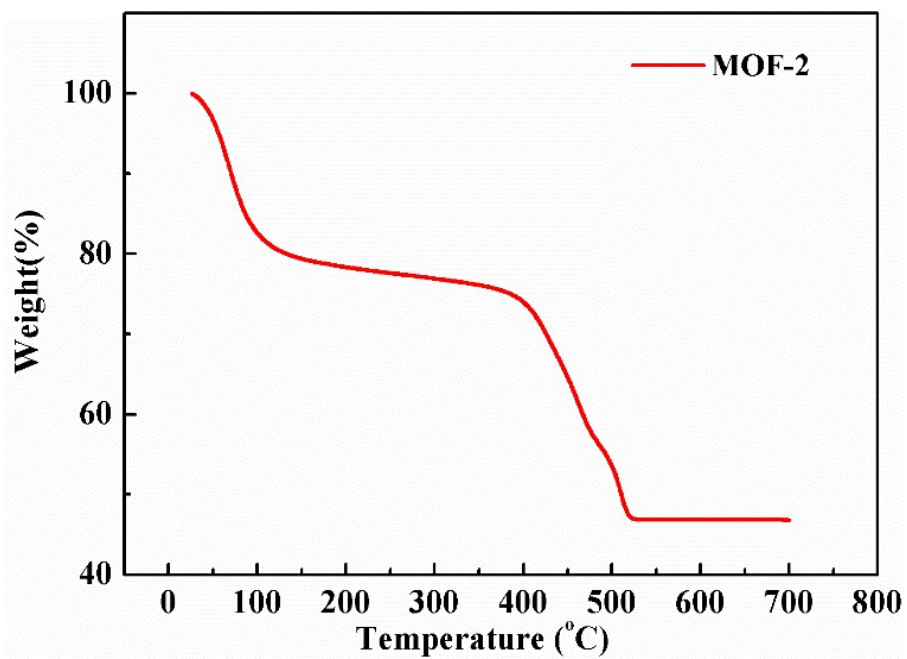

Fig. S9. The TGA curve of MOF-2.



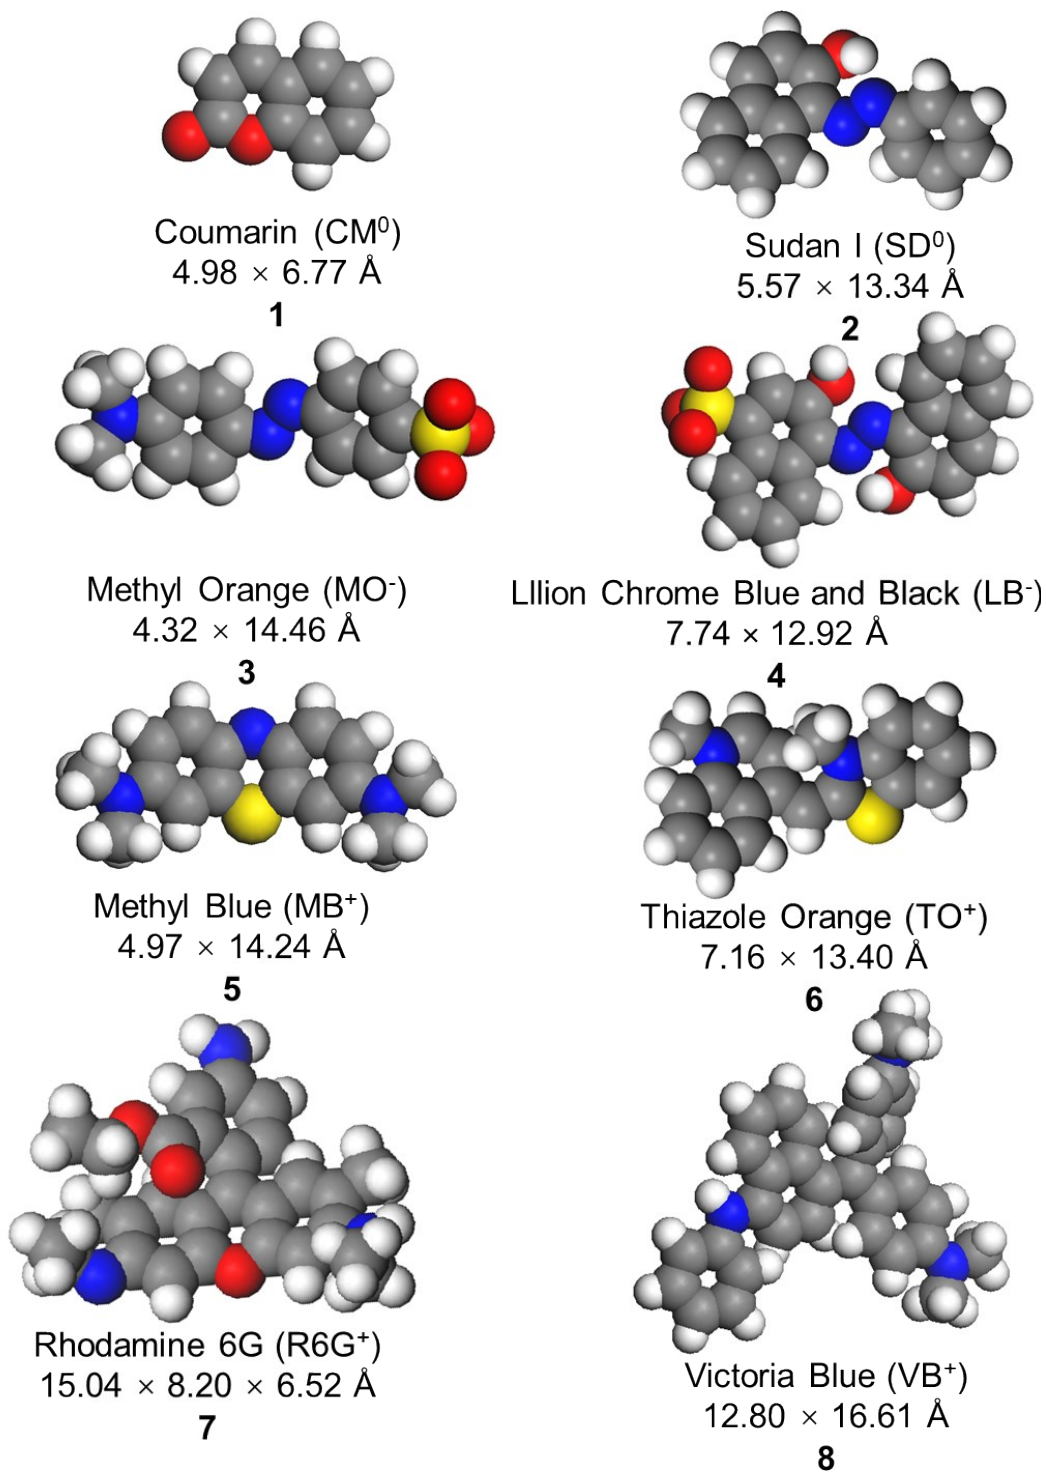

**Fig. S10.** The structures of eight dyes optimized by DFT calculation with Gaussian 09 program package<sup>[S2]</sup>. Grey, red, blue, yellow and white balls represent for C, O, N, S, H atoms.

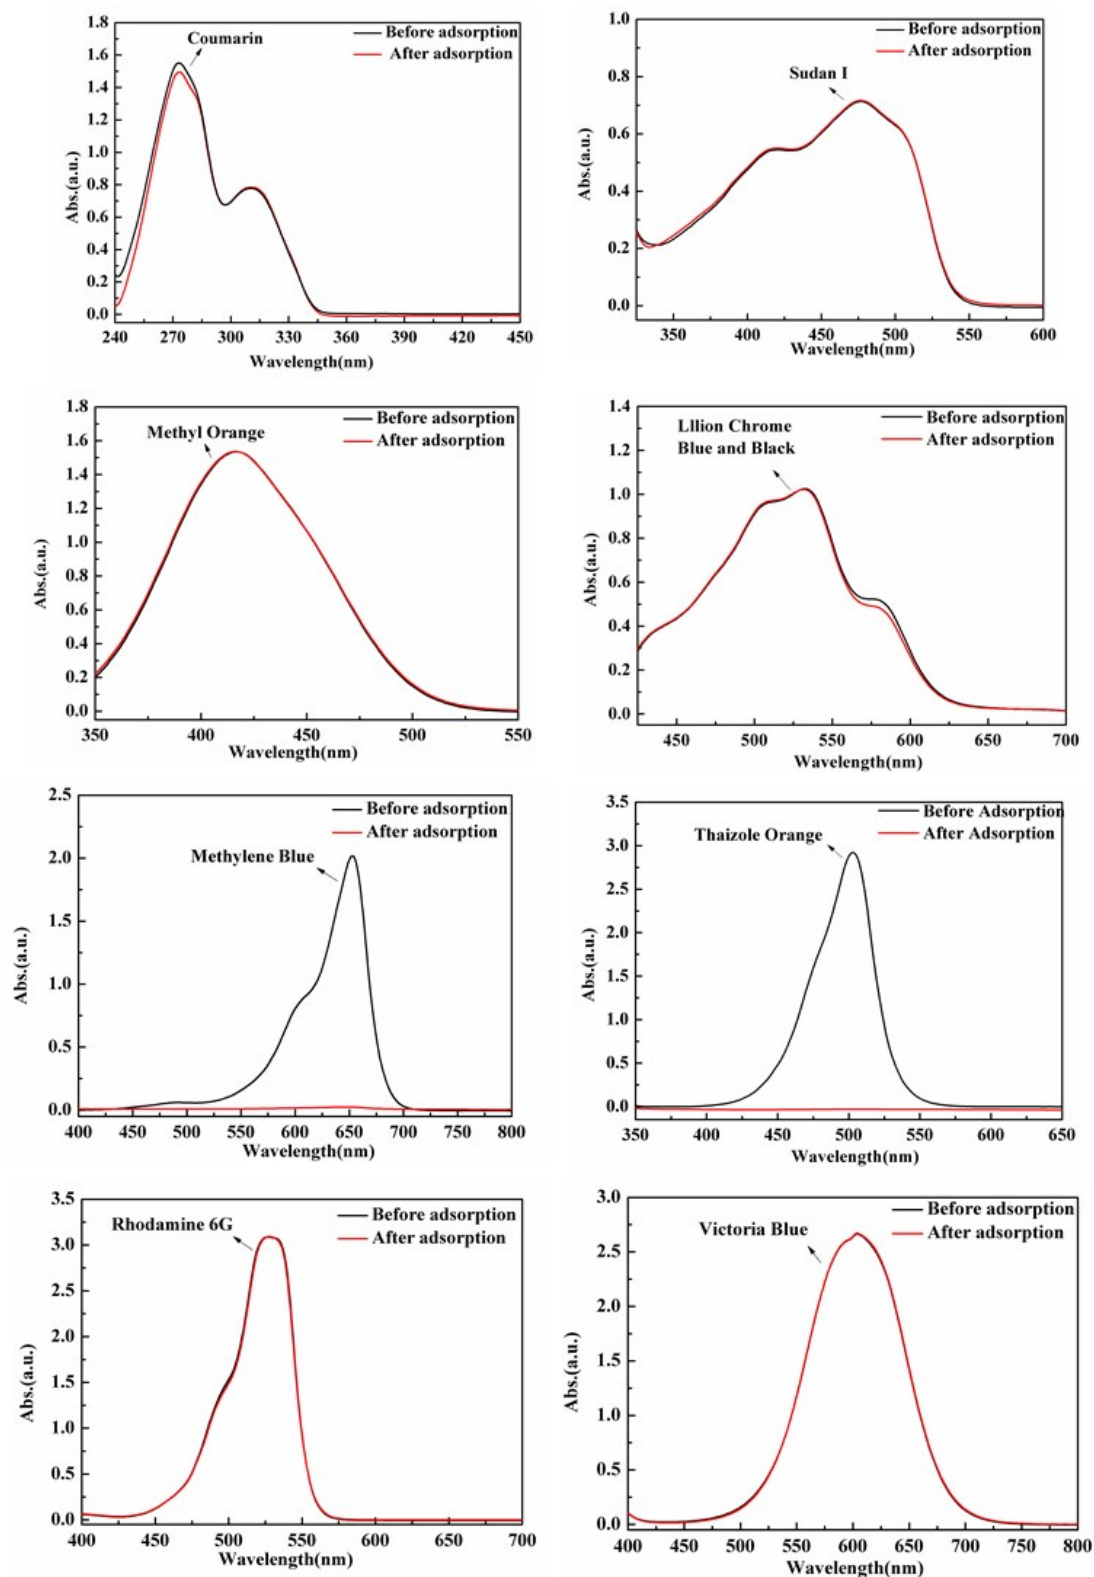

**Fig. S11.** UV/Vis absorption spectra of the DMF solutions of dyes before (black) and after 24 h adsorption with MOF-1.

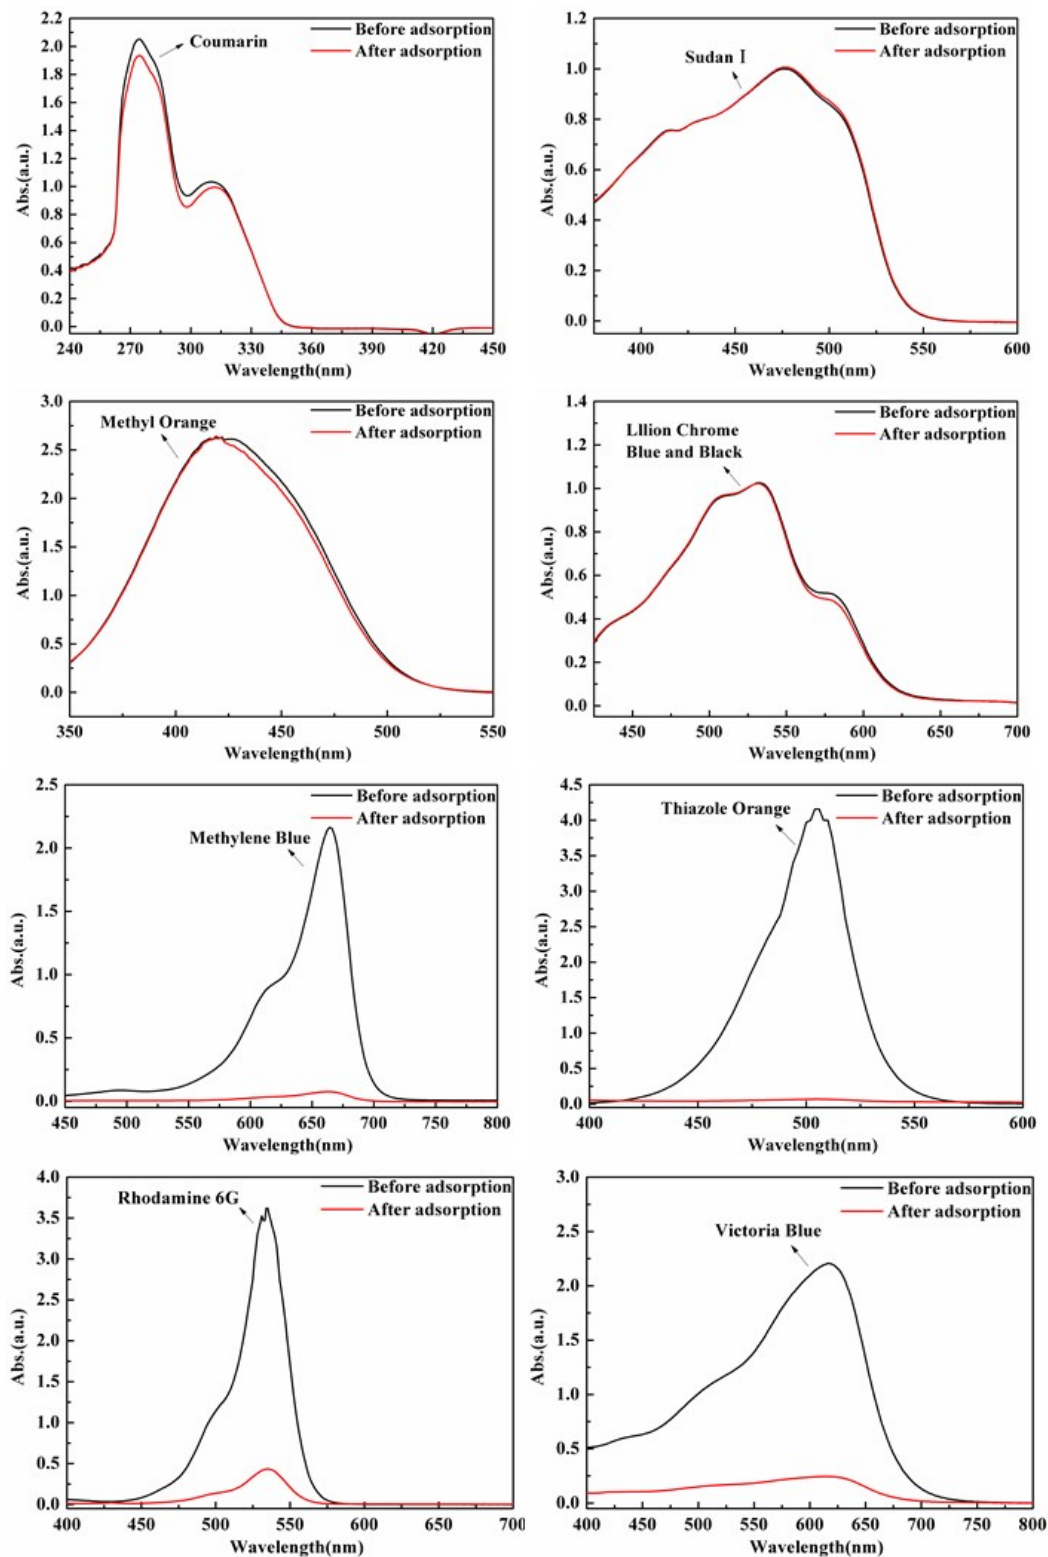

**Fig. S12.** UV/Vis absorption spectra of the DMF solutions of dyes before (black) and after 24 h adsorption with MOF-2.

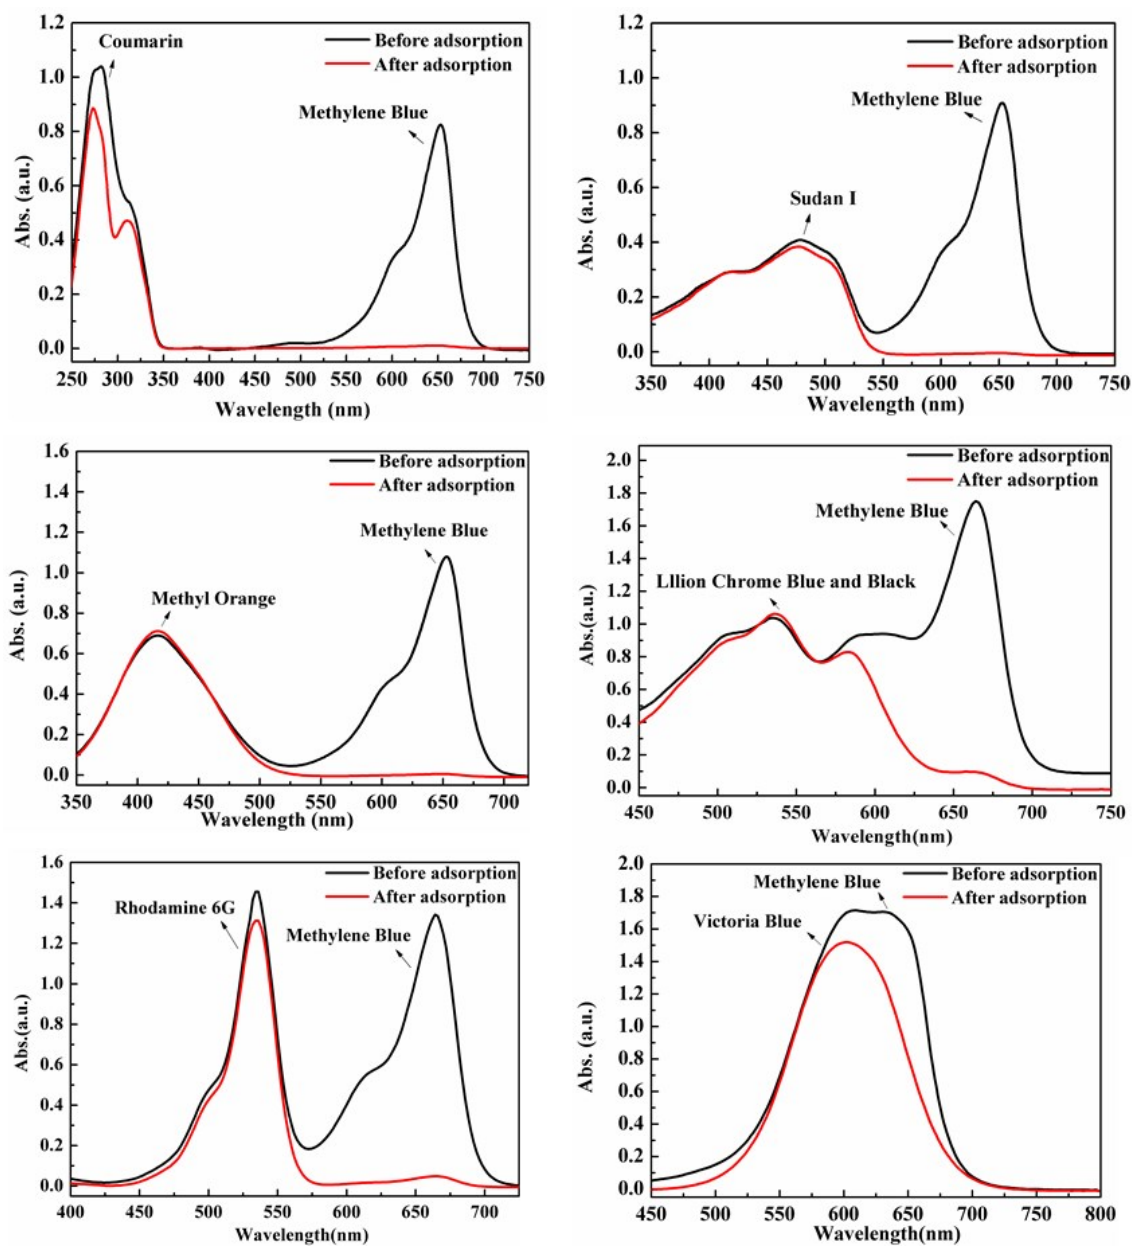

**Fig. S13.** UV/Vis absorption spectra of the DMF solutions of mixed dyes (MB<sup>+</sup> and other dyes) before (black) and after (red) 24 h adsorption with MOF-1.

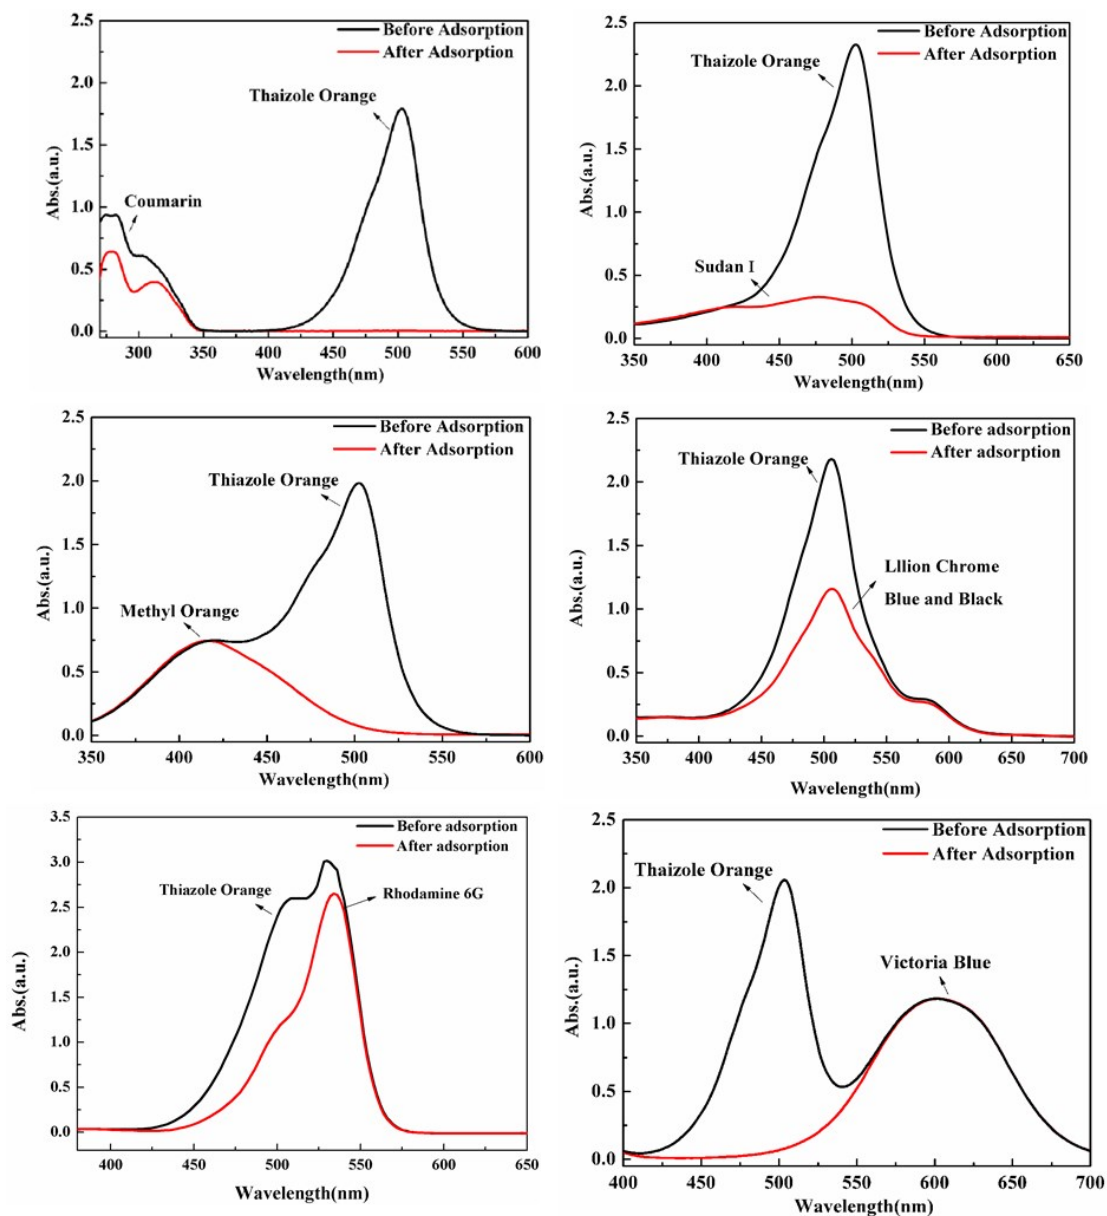

**Fig. S14.** UV/Vis absorption spectra of the DMF solutions of mixed dyes (TO<sup>+</sup> and other dyes) before (black) and after (red) 24 h adsorption with MOF-1.



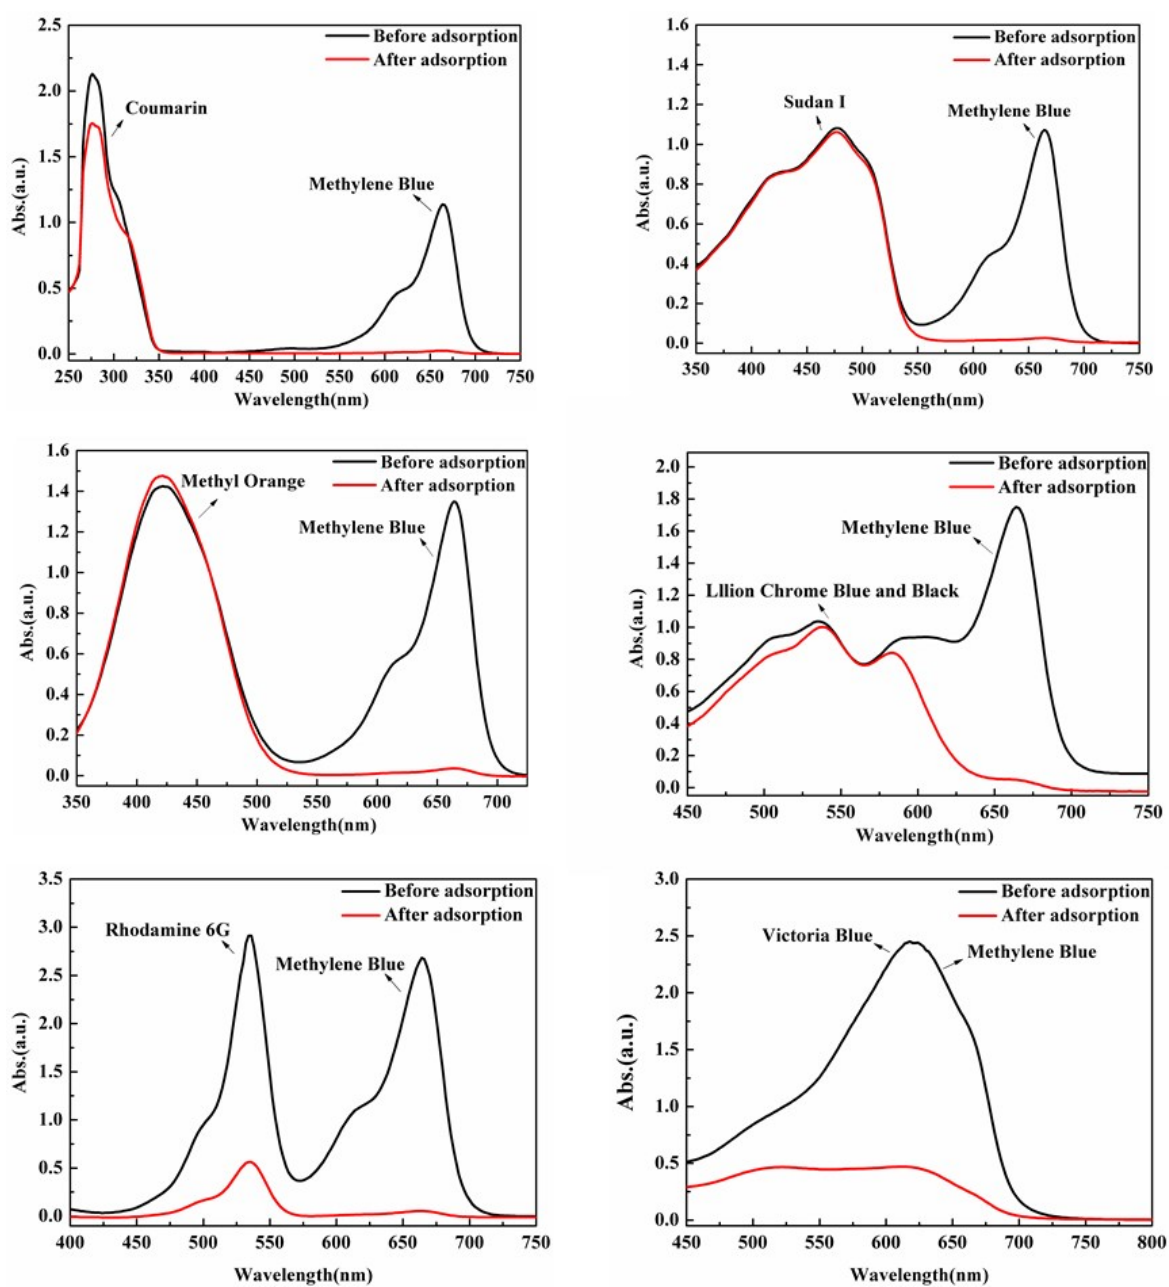

**Fig. S15.** UV/Vis absorption spectra of the DMF solutions of mixed dyes (MB<sup>+</sup> and other dyes) before (black) and after (red) 24 h adsorption with MOF-2.

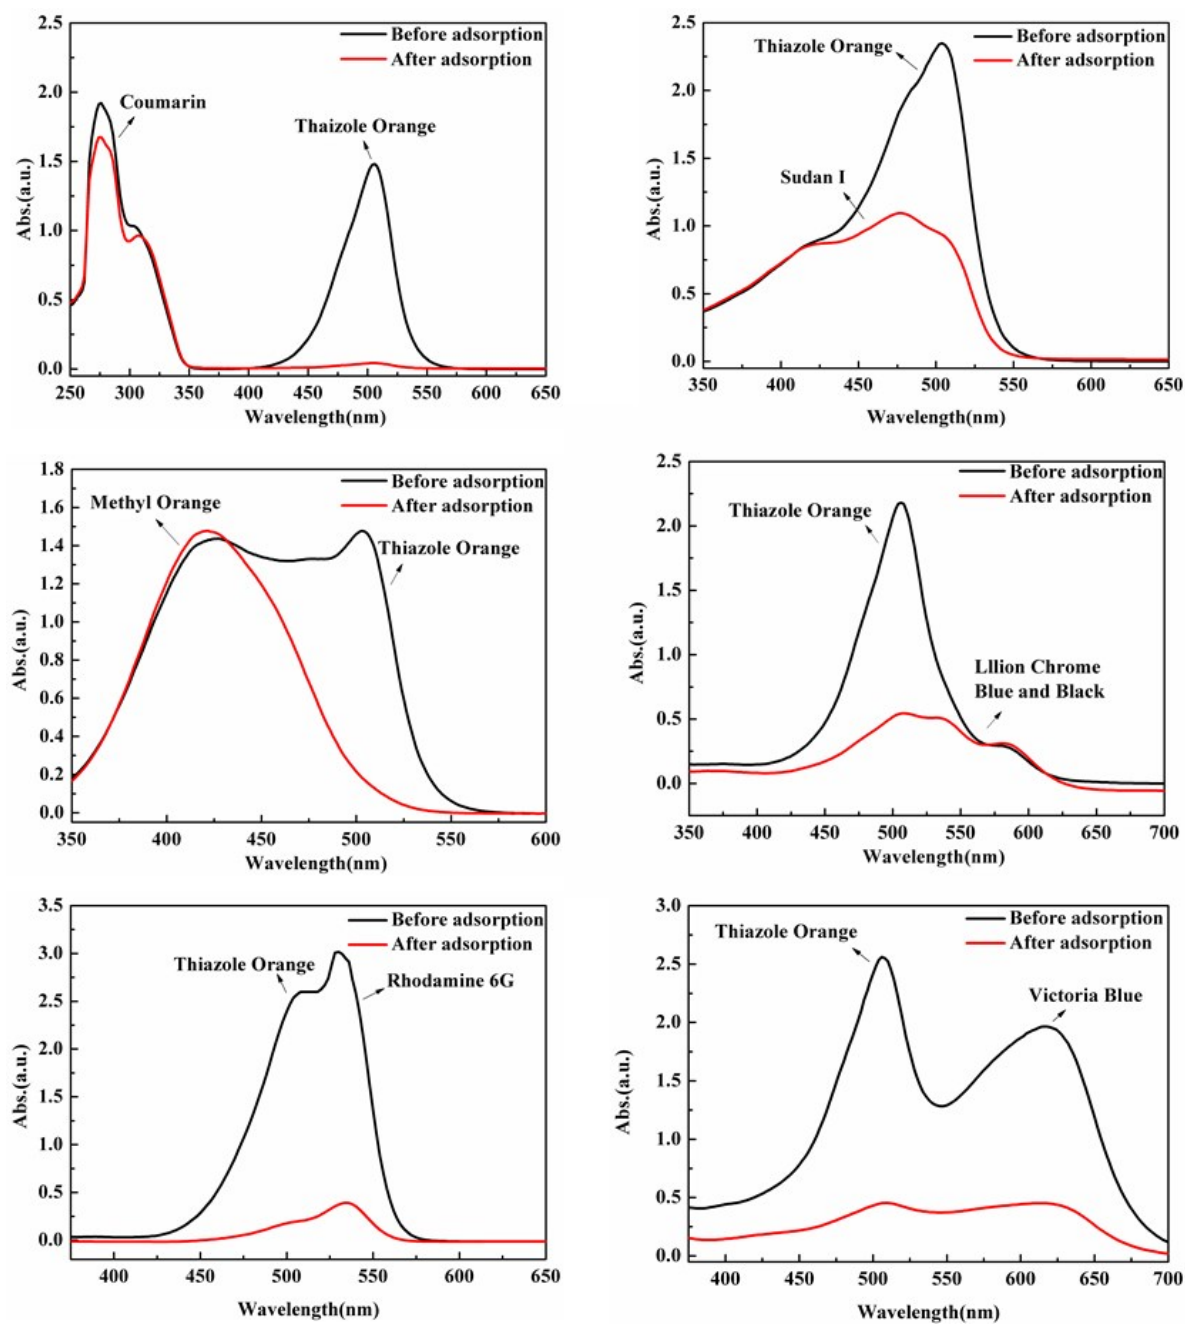

**Fig. S16.** UV/Vis absorption spectra of the DMF solutions of mixed dyes (TO<sup>+</sup> and other dyes) before (black) and after (red) 24 h adsorption with MOF-2.

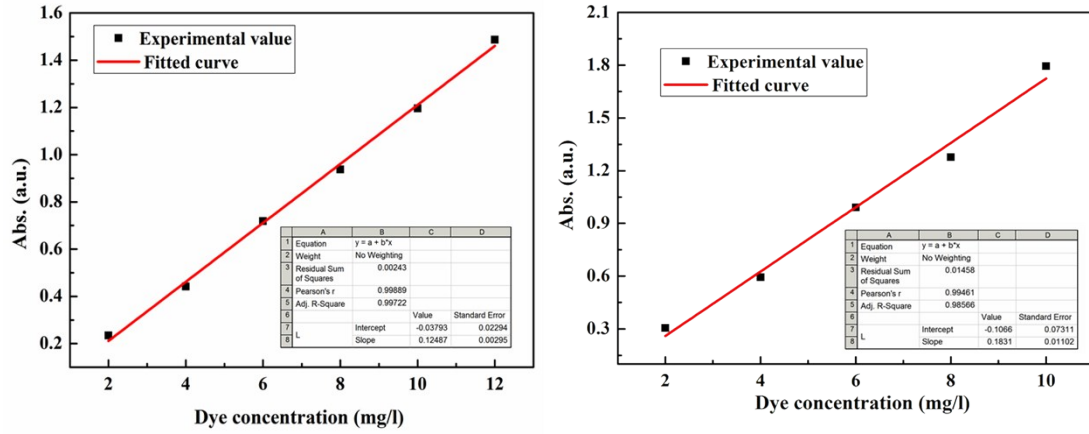

**Fig. S17.** The calibration curves of MB<sup>+</sup> solution and TO<sup>+</sup> solution.

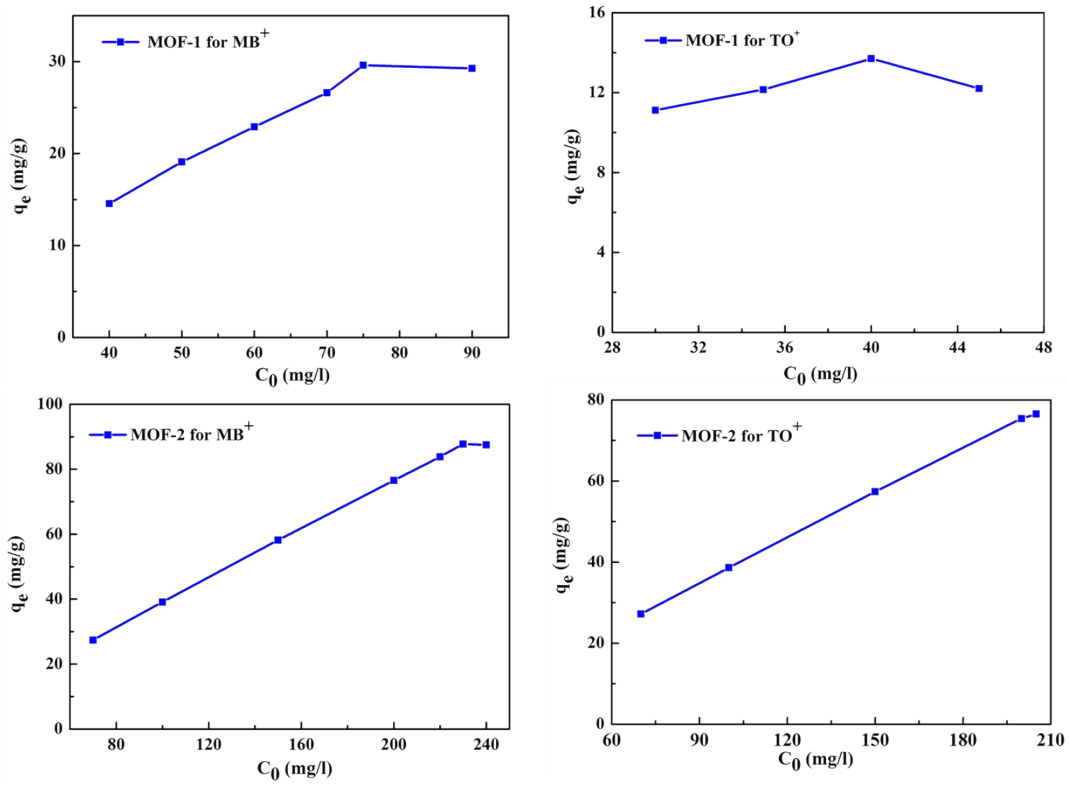

**Fig. S18.** The  $q_e$ - $c_0$  profile involving adsorption capacity of MB<sup>+</sup> and TO<sup>+</sup> by MOF-1 and MOF-2.



**Table S1.** Crystal data and refinement details for MOF-1 and MOF-2.

| Compound reference                                                                     | MOF-1                                                           | MOF-2                                                                         |
|----------------------------------------------------------------------------------------|-----------------------------------------------------------------|-------------------------------------------------------------------------------|
| Chemical formula                                                                       | C <sub>12</sub> H <sub>6</sub> N <sub>3</sub> O <sub>5</sub> Zn | C <sub>22</sub> H <sub>11</sub> N <sub>5</sub> O <sub>7</sub> Zn <sub>2</sub> |
| Formula Mass                                                                           | 337.57                                                          | 588.10                                                                        |
| Crystal system                                                                         | orthorhombic                                                    | trigonal                                                                      |
| Space group                                                                            | <i>Pbcn</i>                                                     | <i>P3<sub>2</sub>21</i>                                                       |
| Temperature/K                                                                          | 113                                                             | 273                                                                           |
| <i>a</i> /Å                                                                            | 13.338(3)                                                       | 20.5369(12)                                                                   |
| <i>b</i> /Å                                                                            | 23.519(5)                                                       | 20.5369(12)                                                                   |
| <i>c</i> /Å                                                                            | 19.056(4)                                                       | 34.603(2)                                                                     |
| $\alpha$ /°                                                                            | 90                                                              | 90                                                                            |
| $\beta$ /°                                                                             | 90                                                              | 90                                                                            |
| $\gamma$ /°                                                                            | 90                                                              | 120                                                                           |
| Unit cell volume/Å <sup>3</sup>                                                        | 5978(2)                                                         | 12638.9(17)                                                                   |
| No. of formula units per unit cell, <i>Z</i>                                           | 8                                                               | 6                                                                             |
| $\mu$ /mm <sup>-1</sup>                                                                | 0.833                                                           | 0.834                                                                         |
| F(000)                                                                                 | 1352.0                                                          | 1764.0                                                                        |
| Radiation type                                                                         | Mo K $\alpha$                                                   | Cu K $\alpha$                                                                 |
| No. of reflections measured                                                            | 60840                                                           | 43126                                                                         |
| No. of independent reflections                                                         | 5874                                                            | 16091                                                                         |
| <i>R</i> <sub>int</sub>                                                                | 0.0471                                                          | 0.0679                                                                        |
| Final <i>R</i> <sub>I</sub> values ( <i>I</i> > 2 $\sigma$ ( <i>I</i> ))               | 0.0724                                                          | 0.0616                                                                        |
| Final <i>wR</i> ( <i>F</i> <sup>2</sup> ) values ( <i>I</i> > 2 $\sigma$ ( <i>I</i> )) | 0.2159                                                          | 0.1523                                                                        |
| Final <i>R</i> <sub>I</sub> values (all data)                                          | 0.0831                                                          | 0.1171                                                                        |
| Final <i>wR</i> ( <i>F</i> <sup>2</sup> ) values (all data)                            | 0.2290                                                          | 0.1832                                                                        |
| Goodness of fit on <i>F</i> <sup>2</sup>                                               | 1.100                                                           | 0.860                                                                         |

**Table S2.** Selected bond lengths [Å] and angles [°] for (MOF-1).

|                                       |            |                                        |            |
|---------------------------------------|------------|----------------------------------------|------------|
| Zn1-N1                                | 2.003(3)   | Zn1-O1 <sup>i</sup>                    | 1.950(3)   |
| Zn1-O1 <sup>iii</sup>                 | 1.950(3)   | Zn1-N1 <sup>iv</sup>                   | 2.003(3)   |
| Zn2-N2                                | 1.987(3)   | Zn2-N2 <sup>iv</sup>                   | 1.987(3)   |
| Zn2-O4 <sup>v</sup>                   | 1.969(4)   | Zn2-O4 <sup>vi</sup>                   | 1.969(4)   |
| O1-C12                                | 1.272(5)   | O2-C12                                 | 1.229(5)   |
| O3-C11                                | 1.250(7)   | O4-C11                                 | 1.243(7)   |
| O5-C4                                 | 1.217(6)   | N1-N2                                  | 1.366(4)   |
| N1-C1                                 | 1.340(5)   | N2-C3                                  | 1.333(5)   |
| N3-C4                                 | 1.346(5)   | N3-C5                                  | 1.422(6)   |
| C1-C2                                 | 1.384(5)   | C2-C3                                  | 1.406(5)   |
| C2-C4                                 | 1.466(6)   | C5-C6                                  | 1.384(7)   |
| C5-C10                                | 1.366(7)   | C6-C7                                  | 1.397(6)   |
| C7-C8                                 | 1.388(6)   | C7-C12                                 | 1.505(7)   |
| C8-C9                                 | 1.399(8)   | C9-C10                                 | 1.381(7)   |
| N3-H3A                                | 0.86       | C1-H1                                  | 0.93       |
| C3-H3                                 | 0.93       | C6-H6                                  | 0.93       |
| C8-H8                                 | 0.93       | C10-H10                                | 0.93       |
| C9-C11                                | 1.483(7)   |                                        |            |
| N1-Zn1-O1 <sup>i</sup>                | 111.22(11) | O1 <sup>i</sup> -Zn1-O1 <sup>iii</sup> | 118.66(11) |
| O1 <sup>i</sup> -Zn1-N1 <sup>iv</sup> | 103.28(11) | N2-Zn2-O4 <sup>v</sup>                 | 102.72(13) |
| N2-Zn2-O4 <sup>vi</sup>               | 119.00(15) | O4 <sup>v</sup> -Zn2-O4 <sup>vi</sup>  | 104.06(17) |
| C12-O1-Zn1 <sup>ii</sup>              | 114.7(3)   | Zn1-N1-C1                              | 127.0(2)   |
| N2-N1-C1                              | 107.6(3)   | N1-N2-C3                               | 109.1(3)   |
| C4-N3-C5                              | 128.3(4)   | C1-C2-C4                               | 126.1(3)   |
| C3-C2-C4                              | 129.3(3)   | O5-C4-C2                               | 121.2(4)   |
| N3-C4-C2                              | 116.5(4)   | C6-C5-C10                              | 120.4(4)   |
| C5-C6-C7                              | 119.3(4)   | C8-C7-C12                              | 120.3(4)   |
| C7-C8-C9                              | 119.6(4)   | C10-C9-C11                             | 119.8(5)   |
| C5-C10-C9                             | 121.3(5)   | O4-C11-C9                              | 117.3(5)   |
| O1-C12-O2                             | 124.0(4)   | C4-N3-H3A                              | 116        |
| C5-N3-H3A                             | 116        | N2-C3-H3                               | 126        |
| C2-C3-H3                              | 126        | C7-C8-H8                               | 120        |
| C9-C8-H8                              | 120        |                                        |            |

Symmetry codes: (i) 1/2-x, 1/2-y, -1/2+z; (ii) -1/2-x, 1/2-y, 1/2+z; (iii) 1/2+x, 1/2-y, -z; (iv) 1-x, y, -1/2-z; (v) 1-x, 1-y, -z; (vi) x, 1-y, -1/2+z.

**Table S3.** Selected bond lengths [Å] and angles [°] for (MOF-2).

|                                         |           |                                         |           |
|-----------------------------------------|-----------|-----------------------------------------|-----------|
| Zn1-O2                                  | 1.923(5)  | Zn1-N5 <sup>i</sup>                     | 1.937(8)  |
| Zn1-N2 <sup>viii</sup>                  | 2.004(5)  | Zn1-O6 <sup>v</sup>                     | 1.906(7)  |
| Zn2-O5                                  | 2.640(6)  | Zn2-O4                                  | 1.924(5)  |
| Zn2-O7 <sup>iv</sup>                    | 1.999(5)  | Zn2-N4                                  | 1.999(7)  |
| O1-C4                                   | 1.265(12) | Zn2-N1 <sup>vi</sup>                    | 1.876(10) |
| O3-C11                                  | 1.231(10) | O2-C11                                  | 1.288(10) |
| O5-C12                                  | 1.225(13) | O4-C12                                  | 1.359(11) |
| O7-C22                                  | 1.210(9)  | O6-C22                                  | 1.297(13) |
| N1-C1                                   | 1.382(9)  | N1-N2                                   | 1.423(8)  |
| N3-C4                                   | 1.322(13) | N2-C3                                   | 1.343(11) |
| N4-N5                                   | 1.441(9)  | N3-C5                                   | 1.316(10) |
| N5-C13                                  | 1.353(13) | N4-C15                                  | 1.307(14) |
| C2-C3                                   | 1.422(10) | C1-C2                                   | 1.483(10) |
| C5-C6                                   | 1.516(11) | C2-C4                                   | 1.402(13) |
| C6-C7                                   | 1.270(13) | C5-C10                                  | 1.423(13) |
| C7-C11                                  | 1.503(12) | C7-C8                                   | 1.433(13) |
| C9-C10                                  | 1.398(13) | C8-C9                                   | 1.395(12) |
| C13-C14                                 | 1.266(16) | C9-C12                                  | 1.463(12) |
| C14-C16                                 | 1.455(16) | C14-C15                                 | 1.357(11) |
| C16-C21                                 | 1.405(15) | C16-C17                                 | 1.419(13) |
| C18-C19                                 | 1.298(14) | C17-C18                                 | 1.347(17) |
| C19-C22                                 | 1.507(17) | C19-C20                                 | 1.425(12) |
| C1-H1                                   | 0.93      | C20-C21                                 | 1.373(18) |
| C6-H6                                   | 0.93      | C3-H3                                   | 0.93      |
| C10-H10                                 | 0.93      | C8-H8                                   | 0.93      |
| C15-H15                                 | 0.93      | C13-H13                                 | 0.93      |
| C18-H18                                 | 0.93      | C17-H17                                 | 0.93      |
| C21-H21                                 | 0.93      | C20-H20                                 | 0.93      |
| O2-Zn1-N5 <sup>i</sup>                  | 124.3(3)  | O2-Zn1-O6 <sup>v</sup>                  | 111.2(3)  |
| O2-Zn1-N2 <sup>viii</sup>               | 102.1(2)  | N5 <sup>i</sup> -Zn1-O6 <sup>v</sup>    | 107.3(3)  |
| N5 <sup>i</sup> -Zn1-N2 <sup>viii</sup> | 104.6(3)  | O6 <sup>v</sup> -Zn1-N2 <sup>viii</sup> | 105.5(4)  |
| O4-Zn2-O5                               | 56.2(2)   | O4-Zn2-N4                               | 112.2(3)  |
| O4-Zn2-O7 <sup>iv</sup>                 | 102.9(2)  | O4-Zn2-N1 <sup>vi</sup>                 | 127.0(2)  |
| O5-Zn2-N4                               | 89.7(3)   | O5-Zn2-O7 <sup>iv</sup>                 | 158.7(2)  |
| O5-Zn2-N1 <sup>vi</sup>                 | 88.6(3)   | N4-Zn2-O7 <sup>iv</sup>                 | 103.9(2)  |

|                           |           |                                        |           |
|---------------------------|-----------|----------------------------------------|-----------|
| N4-Zn2-N1 <sup>vi</sup>   | 105.0(4)  | O7 <sup>iv</sup> -Zn2-N1 <sup>vi</sup> | 103.3(4)  |
| Zn1-O2-C11                | 113.1(5)  | Zn2-O4-C12                             | 106.0(5)  |
| Zn2-O5-C12                | 76.8(5)   | C22-O6-Zn1 <sup>v</sup>                | 128.5(6)  |
| C22-O7-Zn2 <sup>iii</sup> | 137.1(8)  | N2-N1-C1                               | 101.2(6)  |
| N2-N1-Zn2 <sup>vii</sup>  | 118.7(4)  | C1-N1-Zn2 <sup>vii</sup>               | 140.1(5)  |
| N1-N2-C3                  | 112.5(5)  | N1-N2-Zn1 <sup>viii</sup>              | 117.4(5)  |
| C3-N2-Zn1 <sup>viii</sup> | 129.6(4)  | C4-N3-C5                               | 127.7(8)  |
| Zn2-N4-N5                 | 115.9(6)  | Zn2-N4-C15                             | 135.9(6)  |
| N5-N4-C15                 | 108.2(6)  | N4-N5-C13                              | 100.1(7)  |
| N4-N5-Zn1 <sup>ii</sup>   | 118.8(5)  | C13-N5-Zn1 <sup>ii</sup>               | 140.9(6)  |
| N1-C1-C2                  | 115.1(6)  | C1-C2-C3                               | 99.0(6)   |
| C1-C2-C4                  | 126.9(7)  | C3-C2-C4                               | 134.2(8)  |
| N2-C3-C2                  | 111.9(6)  | O1-C4-N3                               | 121.8(9)  |
| O1-C4-C2                  | 122.5(9)  | N3-C4-C2                               | 115.5(8)  |
| N3-C5-C6                  | 119.9(7)  | N3-C5-C10                              | 127.1(8)  |
| C6-C5-C10                 | 112.5(7)  | C5-C6-C7                               | 124.0(8)  |
| C6-C7-C8                  | 120.9(8)  | C6-C7-C11                              | 121.0(8)  |
| C8-C7-C11                 | 117.9(8)  | C7-C8-C9                               | 120.3(8)  |
| C8-C9-C10                 | 118.4(8)  | C8-C9-C12                              | 118.7(8)  |
| C10-C9-C12                | 122.9(8)  | C5-C10-C9                              | 123.9(8)  |
| O2-C11-O3                 | 124.6(8)  | O2-C11-C7                              | 114.1(7)  |
| O3-C11-C7                 | 121.3(7)  | O4-C12-O5                              | 120.3(8)  |
| O4-C12-C9                 | 112.2(8)  | O5-C12-C9                              | 126.5(8)  |
| N5-C13-C14                | 116.2(7)  | C13-C14-C15                            | 105.5(9)  |
| C13-C14-C16               | 130.0(8)  | C15-C14-C16                            | 124.5(9)  |
| N4-C15-C14                | 110.0(8)  | C14-C16-C17                            | 124.1(10) |
| C14-C16-C21               | 123.2(8)  | C17-C16-C21                            | 112.6(10) |
| C16-C17-C18               | 125.6(11) | C17-C18-C19                            | 121.6(9)  |
| C18-C19-C20               | 116.9(10) | C18-C19-C22                            | 123.3(8)  |
| C20-C19-C22               | 119.8(9)  | C19-C20-C21                            | 122.6(11) |
| C16-C21-C20               | 120.6(9)  | O6-C22-O7                              | 124.7(11) |
| O6-C22-C19                | 118.6(7)  | O7-C22-C19                             | 116.7(10) |
| N1-C1-H1                  | 122       | C2-C1-H1                               | 122       |
| N2-C3-H3                  | 124       | C2-C3-H3                               | 124       |
| C5-C6-H6                  | 118       | C7-C6-H6                               | 118       |
| C7-C8-H8                  | 120       | C9-C8-H8                               | 120       |

|             |     |             |     |
|-------------|-----|-------------|-----|
| C5-C10-H10  | 118 | C9-C10-H10  | 118 |
| N5-C13-H13  | 122 | C14-C13-H13 | 122 |
| N4-C15-H15  | 125 | C14-C15-H15 | 125 |
| C16-C17-H17 | 117 | C18-C17-H17 | 117 |
| C17-C18-H18 | 119 | C19-C18-H18 | 119 |
| C19-C20-H20 | 119 | C21-C20-H20 | 119 |
| C16-C21-H21 | 120 | C20-C21-H21 | 120 |

Symmetry codes: (i)  $1-y, 1+x-y, -1/3+z$ ; (ii)  $-x+y, 1-x, 1/3+z$ ; (iii)  $-1+y, x, 1-z$ ; (iv)  $y, 1+x, 1-z$ ; (v)  $-x, -x+y, 2/3-z$ ; (vi)  $1-x, -x+y, 2/3-z$ ; (vii)  $1-x, 1-x+y, 2/3-z$ ; (viii)  $1+x-y, 2-y, 1/3-z$ .

## References

- S1 X.-T. Liu, Y.-Y. Jia, Y.-H. Zhang, G.-J. Ren, R. Feng, S.-Y. Zhang, M. J. Zaworotkoc and X.-H. Bu, *Inorg. Chem. Front.*, 2016, **3**, 1510-1515.
- S2 Y.-Y. Jia, G.-J. Ren, A.-L. Li, L.-Z. Zhang, R. Feng, Y.-H. Zhang and X.-H. Bu, *Cryst. Growth Des.*, 2016, **16**, 5593-5597.
